# Supplementary material
Source: Springer Nature journal article supplement (https://www.springermedizin.de/resource/supplementary/12936_2012_2155_MOESM7_ESM.pdf/9542752)

**A.**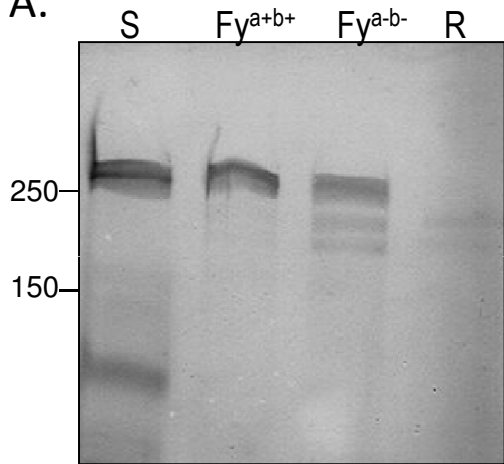 $\alpha$ -rPkNBPXa**B.**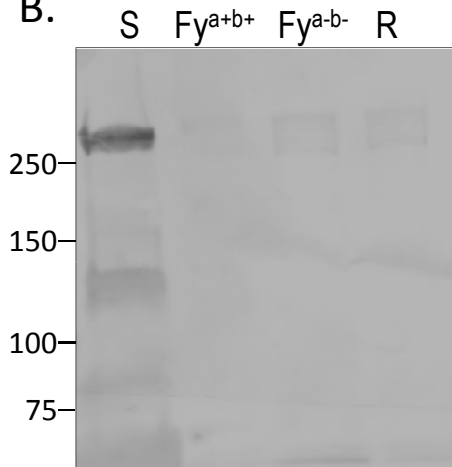 $\alpha$ -rPkNBPXb

Supplement: MOESM7 [file 9542752]
